1 Title: **SARS-CoV-2 has observably higher propensity to accept uracil as nucleotide**  
2 **substitution: Prevalence of amino acid substitutions and their predicted functional**  
3 **implications in circulating SARS-CoV-2 in India up to July, 2020**

4 **Authors:** Subrata Roy<sup>1</sup>, Himadri Nath<sup>1</sup>, Abinash Mallick<sup>1</sup>, Subhajit Biswas<sup>1\*</sup>

5

6 **Affiliations:**

7 *1. Infectious Diseases and Immunology Division, CSIR- Indian Institute of Chemical Biology,*  
8 *Kolkata, West Bengal, India.*

9

10 **Address for correspondence**

11 \* Dr. Subhajit Biswas, CSIR-Indian Institute of Chemical Biology, 4, Raja S.C. Mullick  
12 Road, Kolkata, PIN-700032, West Bengal, India. Email: [subhajit.biswas@iicb.res.in](mailto:subhajit.biswas@iicb.res.in);  
13 [subhajitcam@gmail.com](mailto:subhajitcam@gmail.com); Phone: (+) 91-(0) 33-2499-5776. Fax: (+) 91-(0) 33-2473-5197;  
14 (+) 91-(0) 33-2472-3967.

15

16 **Abstract:**

17 SARS-CoV-2 has emerged as pandemic all over the world since late 2019. In this study, we  
18 investigated the diversity of the virus in the context of SARS-CoV-2 spread in India. Full-  
19 length SARS-CoV-2 genome sequences of the circulating viruses from all over India were  
20 collected from GISAID, an open data repository, until 25<sup>th</sup> July, 2020. We have focused on  
21 the non-synonymous changes across the genome that resulted in amino acid substitutions.  
22 Analysis of the genomic signatures of the non-synonymous mutations demonstrated a strong  
23 association between the time of sample collection and the accumulation of genetic diversity.  
24 Most of these isolates from India belonged to the A2a clade (63.4%) which has overcome the  
25 selective pressure and is spreading rapidly across several continents. Interestingly a new  
26 clade I/A3i has emerged as the second-highest prevalent type among the Indian isolates,  
27 comprising 25.5% of the Indian sequences. Emergence of new mutations in the S protein was  
28 observed. Major SARS-CoV-2 clades in India have defining mutations in the RdRp.  
29 Maximum accumulation of mutations was observed in ORF1a.

30 Other than the clade-defining mutations, few representative non-synonymous mutations were  
31 checked against the available crystal structures of the SARS-CoV-2 proteins in the DynaMut  
32 server to assess their thermodynamic stability. We have observed that SARS-CoV-2 genomes  
33 contain more uracil than any other nucleotide. Furthermore, substitution of nucleotides to  
34 uracil was highest among the non-synonymous mutations observed. The A+U content in  
35 SARS-CoV-2 genome is much higher compared to other RNA viruses, suggesting that the  
36 virus RdRp has a propensity towards uracil incorporation in the genome. This implies that  
37 thymidine analogues may have a better chance to competitively inhibit SARS-CoV-2 RNA  
38 replication than other nucleotide analogues.

39 **Keywords:** SARS-CoV-2, uracil, non-synonymous mutation

40        **1. Introduction:**

41        The world is in a pandemic situation due to an outbreak of highly infectious human to human  
42        transmissible virus, named SARS-CoV-2. Since the first novel pneumonia case in Wuhan,  
43        China 17,396,943 confirmed cases with 675,060 deaths were reported until 1<sup>st</sup> August 2020  
44        (WHO, 2020). The virus was found to be a strain of beta-coronavirus and related to SARS-  
45        like BAT coronaviruses, bat-SL-CoVZC45 and bat-SL-CoVZXC21 with 88% similarity;  
46        79.5% homology with SARS, and 50% with MERS (Lu *et al.*, 2020; Wu *et al.*, 2020). The  
47        virus originated from its root (Wuhan) and is changing while spreading throughout the world.  
48        It is an RNA virus with a higher mutation rate over DNA viruses. Therefore, characterisation  
49        of circulating strains is important to correlate with disease pathogenesis and outcome; decide  
50        on treatment strategies as well as to obtain real-time background information for developing  
51        effective vaccines and antivirals.

52        Over the few months, several studies have been published which reported some novel  
53        mutations in Indian isolates. In this study, whole-genome mutation analysis has been done for  
54        a total of 1878 sequences that have been reported from India. Nucleotide changes that have  
55        introduced non-synonymous changes in the gene have been considered for analysis. Here, all  
56        the sequences were analyzed to find in which clades they fit best in respect to the global  
57        scenario. In this study, we have presented a clear understanding of the mutations prevalent in  
58        SARS-CoV-2 isolates from India till the end of July 2020.

59

60        **2. Materials and methods:**

61        Since the outbreak of SARS-CoV-2 in China in December 2019, GISAID  
62        (<https://www.gisaid.org/>) has become a global repository for coronavirus genome sequences.  
63        For this study, 365 full genome sequences from India until 25<sup>th</sup> May, 2020 were collected

64 from the GISAID server. Later 1513 more sequences were added to this study to compare  
65 the pattern of SARS-CoV-2 spread across India. Sequences were aligned using the MEGA X  
66 software (Kumar *et al.*, 2018). Position of amino acids was defined with respect of the first  
67 viral genome sequence, named ncov2019-Wuhan-hu-1/2019 (GenBank accession no:  
68 MN908947), taken as the parental or reference strain in the multiple sequence alignment.  
69 Analysis of data was done using Bioedit (Hall, Biosciences and Carlsbad, 2011).

70 The functional implications of non-synonymous mutations were predicted in the DynaMut  
71 (Rodrigues *et al.*, 2018) server utilizing the available crystal structure data specific to SARS-  
72 CoV-2 proteins. Several mutations which were found to be selective in the population;  
73 reported previously as important, or used as a marker to define different clades, were studied  
74 in DynaMut to study their functional importance. DynaMut score  $\Delta\Delta G$  for each mutation was  
75 considered to predict whether the mutation is stabilizing or not. In order to predict the  
76 flexibility of a protein with a given mutation, the free entropy change was considered and this  
77 also gives the prediction of future selectivity of the said mutation. Flexibility and rigidity are  
78 the key contributors to protein function. Consequently, in higher temperature fluctuations, a  
79 rigid protein structure is beneficial for protein structure stability rather than a flexible  
80 structure (M, 1987). In our DynaMut studies,  $\Delta\Delta S_{Vib} ENCoM$  is the change in vibrational  
81 entropy energy between wild-type and mutant protein. The value of  $\Delta\Delta S_{Vib} ENCoM$   
82 predicted in the DynaMut server for each point mutation signifies the change in the molecular  
83 flexibility of the protein. Negative value indicates a decrease in flexibility and vice versa.  
84 This means mutations that confer potential structural rigidity to the proteins ( $\Delta\Delta G$  value  
85 positive;  $\Delta\Delta S_{Vib} ENCoM$ , negative) might compensate for higher temperature oscillations.  
86 Hence based on the calculative predictions, such mutations may constitute a stable  
87 conformation of the proteins in the virus evolution.

88 In this study, the potential impact of a point mutation in the protein structure was also  
89 predicted via free energy-based ( $\Delta G$ ) calculative method in DynaMut server. Low free energy  
90 value signifies a stable protein conformation and high free energy value for unstable protein  
91 conformation. So, if an amino acid substitution lowers the free energy value from the wild  
92 type, the mutation dictates a stabilizing conformation of the protein. From the DynaMut  
93 server, we obtained a  $\Delta\Delta G$  value which means a difference between  $\Delta G$  wildtype and  $\Delta G$   
94 mutation ( $\Delta\Delta G = \Delta G$  wildtype -  $\Delta G$  mutation).

95

### 96 **3. Results:**

#### 97 **3.1. Defining types of SARS-CoV-2**

98 Overall, a high level of sequence identity throughout the 29 kb genome was observed  
99 considering the single nucleotide polymorphisms that resulted in change of amino acids in  
100 comparison to the reference sequence (MN908947.3). Other than the clade-defining ones,  
101 mutations that occurred on more than ten occasions (considering all sequences), have been  
102 used in our analysis. Others have been ignored as they may be sequencing artefacts.  
103 According to previous reports, the earliest sequences of SARS-CoV-2 from China belonged  
104 to clade O. In addition to the ancestral type (O), there were 10 derived types. Among them  
105 five derived types had high frequencies in India, namely O, B, B1, A1a, and A2a up to early  
106 May, 2020 (Biswas and Majumder, 2020).

107 In total, 1190 isolates contained both D614G (nt 23403 A>G) in spike protein along with  
108 P323L (nt 14408C>T) in RdRp of ORF1b which group them under the A2a clade. The  
109 viruses of clade A2a constituted 63.4% of the total reported sequences in India. Twenty-  
110 seven isolates were A3 type (1.4%), containing the clade-defining mutations V378I (nt  
111 1397G>A) and L3606F (nt 11083G>T) in ORF1a. Total 82 isolates from India contained

112 L84S (nt 28144T>C) mutation in ORF8 which is a clade-defining mutation for B type.  
113 Among them, 73 isolates also had S202N (nt 28878G>A) mutation in N gene as well. These  
114 73 isolates belonged to B4 type (3.9%). Among the rest 9 isolates, 8 isolates were of B type  
115 (0.4%) (Fig: 1). Therefore, it appears that B4 emerged from B and predominated among the B  
116 types over the duration of our study. The other isolate with the L84S mutation belonged to  
117 A2a type (Supplementary Table 1).

118 Up to 1<sup>st</sup> May, 2020 only 8 out of the total 56 Indian isolates reported till that time, contained  
119 some novel mutations i.e. P13L (nt 28311C>T, N gene), A97V (nt 13730C>T in RdRp  
120 ORF1b) and T2016K (nt 6312C>A) along with L3606F (nt 11083G>T) in ORF1a. Later,  
121 with more and more sequences being available, a different cluster gradually emerged with the  
122 above three clade-defining mutations. This clade had been named I/A3i (Jolly *et al.*, 2020).  
123 In case of few isolates, any one of the above-mentioned mutations could not be determined  
124 but rest were present, so those genomes had been included within the I/A3i type.  
125 Interestingly, this cluster was found to constitute 40% of the total reported sequences in India  
126 until 25<sup>th</sup> May. However, the scenario changed on extending our study to the end of July. The  
127 I/A3i type decreased to 25.5% of the total sequence observed, while A2a subtype increased  
128 from 50% to 63% of the total study population. Emergence of another subtype was observed  
129 in the form of A2 in case of the SARS-CoV-2-infected Indian population. Until the end of  
130 May, no A2 subtype was observed which carried only the D614G mutation in the spike  
131 protein. But extended study identified 61 sequences (3.2%) of A2 subtype in the Indian  
132 population. In case of 31 Indian isolates, specific clade couldn't be assigned due to lack of  
133 sufficient or confirmed sequence information in the clade-defining positions.

134

135

136        **3.2.Other non-synonymous mutations:**

137        Our study has identified some other mutations among the different clades which may play an  
138        important role in the course of viral genome divergence (Table 1). For instance, besides the  
139        clade-defining mutations, two other mutations were observed in high frequency (n=20/27  
140        each) in the A3 cluster; i.e. R207C and M2796I in nsp2 and nsp4 respectively.

141        Two consecutive amino acid changes R203K and G204R could be observed in the  
142        nucleocapsid phosphoprotein (N protein) of approx. 30% A2 and 37% A2a Indian isolates.  
143        These mutations were previously reported to be also abundant in the USA (Joshi and Paul,  
144        2020). Over the course of infection A2a type has acquired highest number of mutations in  
145        ORF1a such as, S318L (n=34/1190) and Q676P (n=55/1190) in nsp2; A1812D (n=232/1190)  
146        and S2103F (n=112/1190) in nsp3; D3042N (n=34/1190) and A3143V (n=69/1190) in nsp4  
147        and S3517F (n=38/1190) in nsp5 of ORF1a (Fig:2). Similarly, A2a type also showed non-  
148        synonymous changes in other regions, like Q57H (n=328/1190) and L46F (n=109/1190) in  
149        ORF3a and S194L (n=187/1190) in the N gene. Another mutation in N gene P13L was  
150        observed abundantly in I/A3i type (n=412/478). Other mutations in ORF1a, like G519S  
151        (n=34/478) and S2015R (n=61/478) were observed with a high frequency of occurrence in  
152        I/A3i clade. The newly emerged A2 type in India also showed high number of mutations in  
153        ORF1a as observed in case of the A2a type (details in Table 1).

154

155        **3.3.DynaMut Analysis**

156        DynaMut analysis was done to predict the effect of a point mutation on respective protein  
157        stability and molecular flexibility. In the case of spike protein, the mutation D614G had a  
158        structurally stabilizing effect on the protein in terms of free energy change ( $\Delta\Delta G$ ) (Table 2)  
159        and is a clade-defining stable mutation for A2 and A2a types. Similarly in case of nsp12  
160        (RdRp), two clade-defining mutations A97V and P323L also appeared to have stabilizing  
161        effect on the RNA polymerase, with decreased molecular flexibility (Karshikoff, Nilsson and  
162        Ladenstein, 2015). A representative mutation in nsp3 i.e. I1159M was found to be  
163        destabilizing and occurred at lower frequency(n=14). Interestingly, DynaMut analysis  
164        revealed R408I mutation in S protein to be a stabilizing one but this mutation appeared on a  
165        single occasion in a O type virus among all sequences analyzed (Table 2).

166

167        **3.4.The propensity of the nucleotide changes**

168        The SARS-CoV-2 viral genome is made up of 62% A+U content while the G+C content is  
169        38%. In our study, we have observed that uracil content (32% of the total genome) was much  
170        higher in SARS-CoV-2 compared to other RNA viruses like Dengue (20%) or Chikungunya  
171        (20%) (Fig: 3). Furthermore, it was found that majority of the non-synonymous mutations  
172        occurred due to change of other nucleotides to uracil (64% of the total non-synonymous  
173        mutations analysed). The highest rate of substitution was observed as cytosine to uracil (40%  
174        of the total number of mutations). (Fig: 4)

175



176 **4. Discussion:**

177 Since the outbreak of the SARS-CoV-2, it spread rapidly to more than 200 countries in  
178 different continents. Notably, the USA and Western European countries like Spain and Italy  
179 had seen a high rate of mortality. Until August 1<sup>st</sup>, 2020 India has reported 1,695,988  
180 confirmed cases and 36,511 deaths due to COVID-19 (WHO, 2020). Compared to the global  
181 scenario where death rate due to SARS-CoV-2 was 3.8%, a densely populated country like  
182 India had reported only 2.15% mortality due to this highly transmissible virus.

183 This study was done to understand whether the observed geographical variations in the  
184 prevalence of infection, had any relation with particular SARS-CoV-2 clusters. The study  
185 was done to assess pathogen evolution with disease transmission. Studies have revealed that a  
186 particular subtype A2a, had spread rapidly throughout the European and North American  
187 continents and entered East Asia in January 2020. The spread of this subtype rapidly  
188 increased from 2% to 60% within 10 weeks (Bhattacharyya *et al.*, 2020).

189 Most of the sequences from India belonged to the A2a subtype before 1<sup>st</sup> May. But another  
190 cluster of sequences was reported later and classified as I/A3i subtype (Jolly *et al.*, 2020).  
191 Surprisingly, the spread of the I/A3i subtype escalated from 14% to 40% of the total reported  
192 sequence within 3 weeks (1<sup>st</sup> May to 25<sup>th</sup> May 2020). Later the spread of I/A3i decreased to  
193 25.5% of the total infections by the end of July. Over this time, the A2 type (3%) of SARS-  
194 CoV-2 emerged in the Indian population, which contained only D614G mutation in the spike  
195 protein as the clade-defining mutation. In the time period covered, mainly two types of  
196 SARS-CoV-2 isolates were prevalent in India i.e. A2a (63.4%) and I/A3i (25.5%). Other  
197 isolates mainly belonged to B4 (3.9%), A3 (1.4%), B (0.4%), O (0.3%) and A1a (0.2%) types  
198 (Fig 1).

199 The most-mentioned mutation in the spike protein, D614G, was observed in all the Indian A2  
200 and A2a sequences (1256 out of 1878 genomes). It has been suggested as one of the major  
201 factors behind the virulence of the virus (Korber *et al.*, 2020). However, the position of this  
202 mutation is far away from the RBD. Reports suggested that D614G mutation at the junction  
203 of the S1 and S2 subunits of S gene introduces an additional cleavage site in the S protein  
204 (Bhattacharyya *et al.*, 2020). It has been predicted to reduce host immune response by  
205 producing “decoy” fragments that bind to and inactivate antiviral antibodies (Park *et al.*,  
206 2016). This was anticipated to help the virus evade the primary immune response and  
207 establish an infection rapidly. It had been experimentally shown that D614G mutation can  
208 also increase infectivity substantially by facilitating receptor-ligand interactions (Zhang *et al.*,  
209 2020). Two other notable mutations P323L in RdRp and C241T (synonymous nucleotide  
210 change) in 5' UTR are co-evolving with this mutation. Coronaviruses contain sub-genomic  
211 identical 5' leader sequence which plays a role in virus replication. It will be interesting to see  
212 whether these changes have any influence on altering the efficiency of viral replication or  
213 not.

214 Two highly predominant clades I/A3i and A2a in India contain distinct mutations in nsp12,  
215 i.e. A97V and P323L respectively. These non-synonymous mutations have been used to  
216 define clade as well. So, the virus is possibly adapting through gain of mutations in the RdRp  
217 and possibly towards more effective replication potential. This proposition also needs  
218 experimental validation.

219 In our analysis, 31 isolates could not be assigned to any specific clade as they either  
220 contained mutations overlapping different clades or ‘N’/s (i.e. nucleotide/s could not be  
221 determined by sequencing) at clade-defining areas of the genomes. One such isolate from  
222 Gujrat (hCoV-19/India/GBRC24b/2020|EPI\_ISL\_437454|2020-04-26) showed a unique  
223 combination of mutations from two different types. This isolate contains P323L (nt

224 14408C>T) in nsp12 but not D614G (nt 23403A>G) in the S gene which is required to define  
225 it as an A2a type. On the other hand, this also contains T2016K (nt 6312C>A) in nsp3 and  
226 A97V (nt 13730C>T) in nsp12 but does not have L3606F (nt 11083G>T) in nsp6. So, it  
227 could not be established as a genuine I/A3i type also. It appears to be either a  
228 hybrid/recombinant of the two types. Alternatively, the patient might have been infected with  
229 two different types of SARS-CoV-2 and this peculiar genome sequence is the artefact of  
230 sequence assembly of reads generated from mixed sequences.

231 As the prevalence of A2a and I/A3i is increasing rapidly, we need to observe closely for these  
232 kinds of isolates. It has been observed that of P13L (nt C28311T) and S194L (nt C28863T)  
233 mutations in nucleocapsid protein are emerging at high frequency among recently uploaded  
234 sequences from India. For instance, the distribution of the P13L mutation in I/A3i clade  
235 (n=412 out of 478) suggests that it is perhaps evolving towards becoming a clade-defining  
236 mutation for I/A3i. S194L mutation was only observed among A2a and A2 types of the  
237 Indian isolates.

238 Non-synonymous mutations that were encountered on  $\geq 10$  occasions were considered in our  
239 study. DynaMut analysis was performed for those SARS-CoV-2 proteins for which the  
240 crystal structure data were available. Mutations such as D614G in S protein and A97V and  
241 P323L in nsp12 were found to be stabilizing by the DynaMut analysis. Their predicted  
242 stability was further supported by the observed high frequency of these mutations suggesting  
243 that these mutations are getting fixed in the population. Interestingly, the R408I mutation (nt  
244 G22785T, n=1) in S protein was predicted as a stable mutation by the DynaMut programme  
245 and had been previously reported as a potential RBD-altering mutation (Saha *et al.*, 2020).  
246 However, this mutation did not appear to have any significance in the selection of the viral  
247 genomes. Since its reporting, this mutation in the O type backbone was never encountered  
248 anymore in the sequences that became predominant henceforth, namely A2a and I/A3i.

249 Instead, the S protein had acquired another mutation, L54F at a high frequency among A2a  
250 and A2 types where D614G is predominant. DynaMut analysis of L54F mutation has also  
251 identified it as a stabilizing one.

252 A2a subtype had acquired the greatest number of mutations in ORF1a compared to other  
253 subtypes. Among them S318L (nt C1218T) and Q676P (nt A2292C) in nsp2; S1515F (nt  
254 C4809T), I1159M (nt A3742G), S1534I (C4809T), A1812D (nt C5700A) and S2013F (nt  
255 C6573T) in nsp3; D3042N (nt G9389A) and A3143V (nt C9693T) in nsp4, S3517F (nt  
256 C10815T) in nsp5 and L3606F (nt G11083T) in nsp6 were highly frequent in the population.  
257 Three mutations in N gene S194L (nt C28854T), R203K (nt G28881A) and G204R (nt  
258 G28883C) were also found to be abundant within the A2a subtype. Furthermore, some  
259 researches indicated that a part of the nucleocapsid (N) protein of SARS-CoV (aa 161–211) is  
260 required for interacting with human cellular heterogeneous nuclear ribonucleoprotein A1 and  
261 this can play a regulatory role in the synthesis of SARS-CoV RNAs (Luo *et al.*, 2005). So, it  
262 would be interesting to see whether these mutations affect SARS-CoV-2 replication or not.

263 Other mutations like L46F (nt C25528T) and Q57H (nt G25563T) in ORF3a were observed  
264 among the A2a isolates at high frequency. The 3a protein was predicted to be a  
265 transmembrane protein (Zeng *et al.*, 2004) and may be involved in ion channel formation  
266 during infection by co-localizing in the Golgi network (Lu, Xu and Sun, 2010). However, the  
267 Q57H mutation does not occur in the 6 defined domains of ORF3a (Issa *et al.*, 2020). It will  
268 be interesting to investigate whether these mutations have any role in virus transmission or  
269 replication.

270 From the perspective of the Indian isolates, occurrence of mutations in ORF1a was observed  
271 at higher number. Among the non-structural proteins of ORF1a, nsp3 (papain-like protease)  
272 tends to accumulate the highest number of mutations. When overall frequencies were

273 compared, D614G in S protein and P323L in nsp12 were found to be highest along with a  
274 synonymous nucleotide change C241T in 5'UTR among all the Indian sequences (Fig 2).

275 SARS-CoV-2 genome is made up of 29.94% adenine, 18.37% guanine, 19.61% cytosine and  
276 32.08% uracil. Compared to other RNA viruses (i.e. Dengue, Chikungunya) SARS-CoV-2  
277 contains a higher amount of uracil (Fig 3). Interestingly, the most frequent changes in  
278 nucleotide were observed as C>T in case of non-synonymous mutations (Fig 4). This virus  
279 tends to change nucleotides into uracil at a high frequency which indicates the biasness of  
280 viral RdRp. These findings can help in selecting effective nucleoside/nucleotide analogues to  
281 test as effective antivirals. Analogously, herpes simplex virus (HSV) genome is GC-rich and  
282 9-(2-hydroxyethoxymethyl) guanine (Acyclovir), the “gold-standard” herpes antiviral is  
283 incidentally a guanosine analogue. Acyclovir was the first highly virus-selective antiviral  
284 drug. It serves as a more preferential substrate for the HSV-encoded thymidine-kinase than  
285 host cell kinases for its initial phosphorylation (Frobert *et al.*, 2005; Jiao *et al.*, 2019).  
286 Previously, 3'-azido-2',3'-unsaturated thymine analogue has shown better activity compared  
287 to other nucleoside analogues against SARS-CoV (EC<sub>50</sub>=10.3 μM) with a significant level of  
288 toxicity (Chu *et al.*, 2006). These findings will be helpful towards developing new antiviral  
289 candidates for SARS-CoV-2 where uracil/thymidine analogues may have an upper hand.

290 In summary, the identification and characterization of mutations in the SARS-CoV-2 genome  
291 will provide a better understanding of viral genome divergence and disease spread (Fig 5).  
292 The observations reported in this study require further experimental confirmation/validation.

293

294

295 **Credit authorship contribution statement:**

296 **Subrata Roy**- Sequence analysis, draft writing, visual representation

297 **Himadri Nath & Abinash Mallick**- DynaMut analysis, review and editing draft.

298 **Subhajit Biswas**- Conceptualization, Supervision and monitoring, Critical review and  
299 editing.

300

301 **Acknowledgement:** SR acknowledges UGC for his Senior Research Fellowship. HN & AM  
302 thank CSIR for their SRF and JRF respectively. The authors acknowledge CSIR-IICB for  
303 providing laboratory facilities for conducting the present work.

304

305 **Funding:** The project was funded by a grant from the **Council of Scientific and Industrial**  
306 **Research, India** to S.B. Grant number: MLP 130; CSIR Digital Surveillance Vertical for  
307 COVID-19 mitigation in India.

308

309 **Disclosure statement**

310 The authors declare no competing interests.

311

312

313 **Supplementary data:**

314 **Supplementary Table 1. Indian SARS CoV 2 sequences and list of mutations**

315 **References:**

316 Bhattacharyya, C. *et al.* (2020) ‘Global Spread of SARS-CoV-2 Subtype with Spike Protein  
317 Mutation D614G is Shaped by Human Genomic Variations that Regulate Expression of  
318 TMPRSS2 and MX1 Genes’, *bioRxiv*, p. 2020.05.04.075911. doi:  
319 10.1101/2020.05.04.075911.

320 Biswas, N. and Majumder, P. (2020) ‘Analysis of RNA sequences of 3636 SARS-CoV-2  
321 collected from 55 countries reveals selective sweep of one virus type’, *Indian Journal of*  
322 *Medical Research*, 0(0), p. 0. doi: 10.4103/ijmr.ijmr\_1125\_20.

323 Chu, C. K. *et al.* (2006) ‘Antiviral activity of nucleoside analogues against SARS-  
324 coronavirus (SARS-CoV)’, *Antiviral Chemistry and Chemotherapy*, 17(5), pp. 285–289. doi:  
325 10.1177/095632020601700506.

326 Frobert, E. *et al.* (2005) ‘Herpes simplex virus thymidine kinase mutations associated with  
327 resistance to acyclovir: A site-directed mutagenesis study’, *Antimicrobial Agents and*  
328 *Chemotherapy*, 49(3), pp. 1055–1059. doi: 10.1128/AAC.49.3.1055-1059.2005.

329 Hall, T., Biosciences, I. and Carlsbad, C. (2011) ‘BioEdit: An important software for  
330 molecular biology’, *GERF Bulletin of Biosciences*, 2(June), pp. 60–61. doi:  
331 10.1002/prot.24632.

332 Issa, E. *et al.* (2020) ‘SARS-CoV-2 and ORF3a: Nonsynonymous Mutations, Functional  
333 Domains, and Viral Pathogenesis’, *mSystems*, 5(3), pp. 1–7. doi: 10.1128/msystems.00266-  
334 20.

335 Jiao, X. *et al.* (2019) ‘Complete Genome Sequence of Herpes Simplex Virus 1 Strain  
336 McKrae’, *Microbiology Resource Announcements*, 8(39). doi: 10.1128/mra.00993-19.

337 Jolly, B. *et al.* (2020) ‘A distinct phylogenetic cluster of Indian SARS-CoV-2 isolates’, pp.

338 1–15.

339 Joshi, A. and Paul, S. (2020) ‘Phylogenetic Analysis of the Novel Coronavirus Reveals  
340 Important Variants in Indian Strains’, pp. 1–12.

341 Karshikoff, A., Nilsson, L. and Ladenstein, R. (2015) ‘Rigidity versus flexibility: The  
342 dilemma of understanding protein thermal stability’, *FEBS Journal*. Blackwell Publishing  
343 Ltd, pp. 3899–3917. doi: 10.1111/febs.13343.

344 Korber, B. *et al.* (2020) ‘Spike mutation pipeline reveals the emergence of a more  
345 transmissible form of SARS-CoV-2’, *bioRxiv*, p. 2020.04.29.069054. doi:  
346 10.1101/2020.04.29.069054.

347 Kumar, S. *et al.* (2018) ‘MEGA X: Molecular evolutionary genetics analysis across  
348 computing platforms’, *Molecular Biology and Evolution*, 35(6), pp. 1547–1549. doi:  
349 10.1093/molbev/msy096.

350 Lu, R. *et al.* (2020) ‘Genomic characterisation and epidemiology of 2019 novel coronavirus:  
351 implications for virus origins and receptor binding’, *The Lancet*, 395(10224), pp. 565–574.  
352 doi: 10.1016/S0140-6736(20)30251-8.

353 Lu, W., Xu, K. and Sun, B. (2010) ‘SARS accessory proteins ORF3a and 9b and their  
354 functional analysis’, in *Molecular Biology of the SARS-Coronavirus*. Springer Berlin  
355 Heidelberg, pp. 167–175. doi: 10.1007/978-3-642-03683-5\_11.

356 Luo, H. *et al.* (2005) ‘The nucleocapsid protein of SARS coronavirus has a high binding  
357 affinity to the human cellular heterogeneous nuclear ribonucleoprotein A1’, *FEBS Letters*,  
358 579(12), pp. 2623–2628. doi: 10.1016/j.febslet.2005.03.080.

359 M, V. (1987) ‘Relationship of protein flexibility to thermostability.’, *Protein Engineering*,  
360 1(6), pp. 477–480. doi: 10.1093/PROTEIN/1.6.477.



- 361 Park, J. E. *et al.* (2016) ‘Proteolytic processing of middle east respiratory syndrome  
362 coronavirus spikes expands virus tropism’, *Proceedings of the National Academy of Sciences*  
363 *of the United States of America*, 113(43), pp. 12262–12267. doi: 10.1073/pnas.1608147113.
- 364 Rodrigues, C. H. *et al.* (2018) ‘DynaMut: predicting the impact of mutations on protein  
365 conformation, flexibility and stability’, *Nucleic Acids Research*, 46. doi: 10.1093/nar/gky300.
- 366 Saha, P. *et al.* (2020) ‘A virus that has gone viral: Amino acid mutation in S protein of Indian  
367 isolate of Coronavirus COVID-19 might impact receptor binding and thus infectivity’,  
368 *bioRxiv*, p. 2020.04.07.029132. doi: 10.1101/2020.04.07.029132.
- 369 WHO (2020) *Coronavirus disease (COVID-19) Situation Report-194*.
- 370 Wu, F. *et al.* (2020) ‘A new coronavirus associated with human respiratory disease in China’,  
371 *Nature*, 579(7798), pp. 265–269. doi: 10.1038/s41586-020-2008-3.
- 372 Zeng, R. *et al.* (2004) ‘Characterization of the 3a protein of SARS-associated coronavirus in  
373 infected vero E6 cells and SARS patients’, *Journal of Molecular Biology*, 341(1), pp. 271–  
374 279. doi: 10.1016/j.jmb.2004.06.016.
- 375 Zhang, L. *et al.* (2020) ‘The D614G mutation in the SARS-CoV-2 spike protein reduces S1  
376 shedding and increases infectivity.’, *bioRxiv*: *the preprint server for biology*, p.  
377 2020.06.12.148726. doi: 10.1101/2020.06.12.148726.
- 378
- 379

| Type            | Gene                   | Defining mutation(s) for individual clades | Other mutations                 | Nucleotide position | Gene   | Frequency of other mutations* |    |
|-----------------|------------------------|--------------------------------------------|---------------------------------|---------------------|--------|-------------------------------|----|
| O<br>(n=6)      | S                      |                                            | R408I                           | G22785T             |        | 1                             |    |
| B<br>(n=8)      | ORF1a                  |                                            | V2586G                          | T8022G              | nsp3   | 1                             |    |
|                 | ORF8                   | L84S<br>(nt: T28144C)                      |                                 |                     |        |                               |    |
|                 | N gene                 |                                            | P13L                            | C28311T             |        | 1                             |    |
| B4<br>(n=73)    | ORF1a                  |                                            | Q676P                           | A2292C              | nsp2   | 4                             |    |
|                 |                        |                                            | V2586G                          | T8022G              | nsp3   | 3                             |    |
|                 |                        |                                            | L3606F                          | G11083T             | nsp6   | 6                             |    |
|                 | ORF1b                  |                                            | L1701F                          | C18568T             | nsp14  | 4                             |    |
|                 |                        |                                            | K2566R                          | A21137G             | nsp14  | 2                             |    |
|                 | ORF8                   | L84S<br>(nt: T28144C)                      |                                 |                     |        |                               |    |
|                 | S gene                 |                                            | L54F                            | G21724T             |        | 2                             |    |
|                 |                        |                                            | D614G                           | A23403G             |        | 4                             |    |
|                 | ORF3a                  |                                            | Q57H                            | G25563T             |        | 2                             |    |
| N               | S202N<br>(nt: G28878A) |                                            |                                 |                     |        |                               |    |
| A1a<br>(n=4)    | ORF1a                  | L3606F<br>(nt: G11083T)<br>nsp6            | V2528G                          | T8022G              | nsp4   | 1                             |    |
|                 | ORF3a                  | G251V<br>(nt: G26144T)                     |                                 |                     |        |                               |    |
| A3<br>(n=27)    | ORF1a                  | V378I<br>(nt: G1397A)<br>nsp2              | R207C                           | C884T               | nsp2   | 20                            |    |
|                 |                        |                                            | L3606F<br>(nt: G11083T)<br>nsp6 | V2528G              | T8022G | nsp3                          | 2  |
|                 |                        |                                            |                                 | M2796I              | G8653T | nsp4                          | 20 |
| A2a<br>(n=1190) | ORF1a                  |                                            | S318L                           | C1218T              | nsp2   | 34                            |    |
|                 |                        |                                            | G519S                           | G1820A              | nsp2   | 5                             |    |
|                 |                        |                                            | V561F                           | G1946T              | nsp2   | 6                             |    |
|                 |                        |                                            | Q676P                           | A2292C              | nsp2   | 55                            |    |
|                 |                        |                                            | II159M                          | A3742G              | nsp3   | 13                            |    |
|                 |                        |                                            | S1515F                          | C4809T              | nsp3   | 20                            |    |

|                  |        |                                 |         |         |       |     |
|------------------|--------|---------------------------------|---------|---------|-------|-----|
|                  |        |                                 | S1534I  | G4866T  | nsp3  | 10  |
|                  |        |                                 | A1812D  | C5700A  | nsp3  | 232 |
|                  |        |                                 | S2103F  | C6573T  | nsp3  | 112 |
|                  |        |                                 | P2376L  | C7392T  | nsp3  | 12  |
|                  |        |                                 | V2586G  | T8022G  | nsp3  | 6   |
|                  |        |                                 | D3042N  | G9389A  | nsp4  | 34  |
|                  |        |                                 | T3058I  | C9438T  | nsp4  | 7   |
|                  |        |                                 | A3143V  | C9693T  | nsp4  | 69  |
|                  |        |                                 | S3517F  | C10815T | nsp5  | 38  |
|                  |        |                                 | L3606F  | G11083T | nsp6  | 16  |
|                  | ORF1b  | P323L<br>(nt:C14408T)<br>nsp12  | A97V    | C13730T | nsp12 | 7   |
|                  |        |                                 | A1169T  | G16945A | nsp13 | 13  |
|                  |        |                                 | L1701F  | C18568T | nsp14 | 54  |
|                  |        |                                 | K2566R  | A21137G | nsp16 | 4   |
|                  | S      | D614G<br>(nt: A23403G)          | L54F    | G21724T |       | 69  |
|                  | ORF 8  |                                 | L84S    | T28144C |       | 1   |
|                  | ORF3a  |                                 | L46F    | C25528T |       | 109 |
|                  |        |                                 | Q57H    | G25563T |       | 328 |
|                  | N      |                                 | P13L    | C28854T |       | 2   |
|                  |        |                                 | S194L   | C28311T |       | 187 |
|                  |        |                                 | R203K   | G28881A |       | 450 |
|                  |        |                                 | G204R   | G28883C |       | 452 |
| I/A3i<br>(n=478) | ORF1a  | T2016K<br>(nt:C6312A)<br>nsp3   | A339V   | C1281T  | nsp2  | 14  |
|                  |        |                                 | S481F   | C1707T  | nsp2  | 11  |
|                  |        |                                 | G519S   | G1820A  | nsp2  | 34  |
|                  |        |                                 | D1939G  | A6081G  | nsp3  | 16  |
|                  |        | L3606F<br>(nt: G11083T)<br>nsp6 | S2015R  | C6310A  | nsp3  | 61  |
|                  | P2376L |                                 | C7392T  | nsp3    | 6     |     |
|                  | V2586G |                                 | T8022G  | nsp3    | 18    |     |
|                  | T3058I |                                 | C9438T  | nsp4    | 1     |     |
|                  |        |                                 | S3517F  | C10815T | nsp5  | 1   |
|                  | ORF1b  | A97V<br>(nt: C13730T)<br>nsp12  | P323L   | C14408T | nsp12 | 5   |
|                  |        |                                 | K2566R  | A21137G | nsp16 | 4   |
|                  | S      |                                 | L54F    |         |       | 1   |
|                  | N      |                                 | P13L    | C28311T |       | 412 |
|                  |        |                                 | R203K   | G28881A |       | 2   |
|                  |        | G204R                           | G28883C |         | 2     |     |

380

|              |       |                        |        |         |       |    |
|--------------|-------|------------------------|--------|---------|-------|----|
| A2<br>(n=61) | ORF1a |                        | Q676P  | A2292C  | nsp3  | 16 |
|              |       |                        | A1812D | C5700A  | nsp3  | 9  |
|              |       |                        | S2103F | C6573T  | nsp3  | 2  |
|              |       |                        | D3042N | G9389A  | nsp4  | 1  |
|              | ORF1b |                        | A1169T | G16945A | nsp13 | 1  |
|              |       |                        | L1701F | C18568T | nsp14 | 14 |
|              | S     | D614G<br>(nt: A23403G) | L54F   | G21724T |       | 14 |
|              | ORF3a |                        | Q57H   | G25563T |       | 21 |
|              |       |                        | L46F   | C25528T |       | 1  |
|              | N     |                        | S194L  | C28311T |       | 27 |
|              |       |                        | S202N  | G28878A |       | 2  |
|              |       |                        | R203K  | G28881A |       | 18 |
|              |       |                        | G204R  | G28883C |       | 17 |

381

382

383 **Table 1: Non-synonymous mutations and corresponding frequencies across the different**  
 384 **clades of Indian SARS-CoV-2 isolates.**

385 \*Except the R408I mutation (n=1) in O type S protein, non-synonymous mutations with  
 386 cumulative frequency of  $\geq 10$ , have only been considered.

387

|                             | <b>Mutation</b>                              | <b>DynaMut <math>\Delta\Delta G</math></b><br>(kcal/mol) | <b><math>\Delta\Delta S_{Vib} ENCoM</math> (<math>\Delta</math> Vibrational<br/>Entropy Energy between<br/>Wild-type and Mutant)</b><br>(kcal.mol <sup>-1</sup> . K <sup>-1</sup> ) |
|-----------------------------|----------------------------------------------|----------------------------------------------------------|-------------------------------------------------------------------------------------------------------------------------------------------------------------------------------------|
| S gene<br>(PDB ID:<br>6VSB) | L54F<br>(n=87)*                              | 1.746<br>(Stabilizing)                                   | -4.764<br>(Decrease of molecule flexibility)                                                                                                                                        |
|                             | R408I<br>(n=1)                               | 1.857<br>(Stabilizing)                                   | -4.408<br>(Decrease of molecule flexibility)                                                                                                                                        |
|                             | D614G<br>(n=1256)                            | 1.128<br>(Stabilizing)                                   | -4.531<br>(Decrease of molecule flexibility)                                                                                                                                        |
| ORF 1a                      | I1159M<br>nsp3<br>(PDB ID: 6WEY)<br>(n=14)   | -0.258<br>(Destabilizing)                                | 0.309<br>(Increase of molecule flexibility)                                                                                                                                         |
|                             | S3517F<br>nsp5<br>(PDB ID: 6Y84)<br>(n=39)   | 1.041<br>(Stabilizing)                                   | -0.249<br>(Decrease of molecule flexibility)                                                                                                                                        |
| ORF1b                       | A97V<br>nsp12<br>(PDB ID: 6M71)<br>(n=462)   | 1.397<br>(Stabilizing)                                   | -5.146<br>(Decrease of molecule flexibility)                                                                                                                                        |
|                             | P323L<br>nsp12<br>(PDB ID: 6M71)<br>(n=1210) | 1.540<br>(Stabilizing)                                   | -4.820 kcal.mol <sup>-1</sup> . K <sup>-1</sup><br>(Decrease of molecule flexibility)                                                                                               |

388

389 **Table 2:** Analysis of the mutations and their stability by DynaMut.

390 \*Frequency of each mutation was calculated including the 31 Indian sequences which were

391 undefined and could not be assigned to any particular clade.

392 **Figure legends:**

393 **Fig 1: Distribution of different types of SARS-CoV-2 among the Indian population. (a)**

394 Most of the isolates belong to 2 major types of virus, A2a and I/A3i. A new cluster of viruses  
395 I/A3i was found to be getting fixed in the population until 25<sup>th</sup> May 2020. **(b)** The extended  
396 study revealed that the percentage of I/A3i decreased from 40% to 25% by 25<sup>th</sup> July 2020 and  
397 A2a became the predominant type.

398

399 **Fig 2: Distribution of non-synonymous mutations across the Indian SARS-CoV-2**

400 **genomes.** Highest accumulation of mutation can be observed in ORF1a compared to the  
401 overall genome. Among the non-structural proteins, nsp3 tends to accumulate the greatest  
402 number of mutations.

403

404 **Fig 3: Comparison of nucleotide composition of SARS-CoV-2 RNA backbone with that**

405 **of two other prevalent RNA viruses in India.** The frequency of uracil is highest among all  
406 four nucleotides in SARS-CoV-2 genomes. This holds true for both older and recently  
407 emergent types of SARS-CoV-2 Indian sequences. Average nucleotide distribution in the  
408 RNA backbone of each virus was calculated from three sequences for each virus. Error bars  
409 represent SD among the three sequences of each virus used in the comparison.

410

411 **Fig 4: Frequency of non-synonymous nucleotide substitutions expressed as a percentage**

412 **of the mutations resulting in amino acid substitutions.** Most frequent changes in  
413 nucleotides were observed in form of C>T (40%). Substitution of G to T was recorded

414 second-highest, sharing 20% of the total non-synonymous mutations. Overall, 64% of all the  
415 non-synonymous mutations were substitutions to uracil/thymidine.

416

417 **Fig 5: Schematic representation of SARS-CoV-2 types prevalent in the Indian**  
418 **population up to July 2020.** It is based on the simplified understanding of the non-  
419 synonymous changes that shaped the emergence, divergence and prevalence of the different  
420 SARS-CoV-2 types.

421

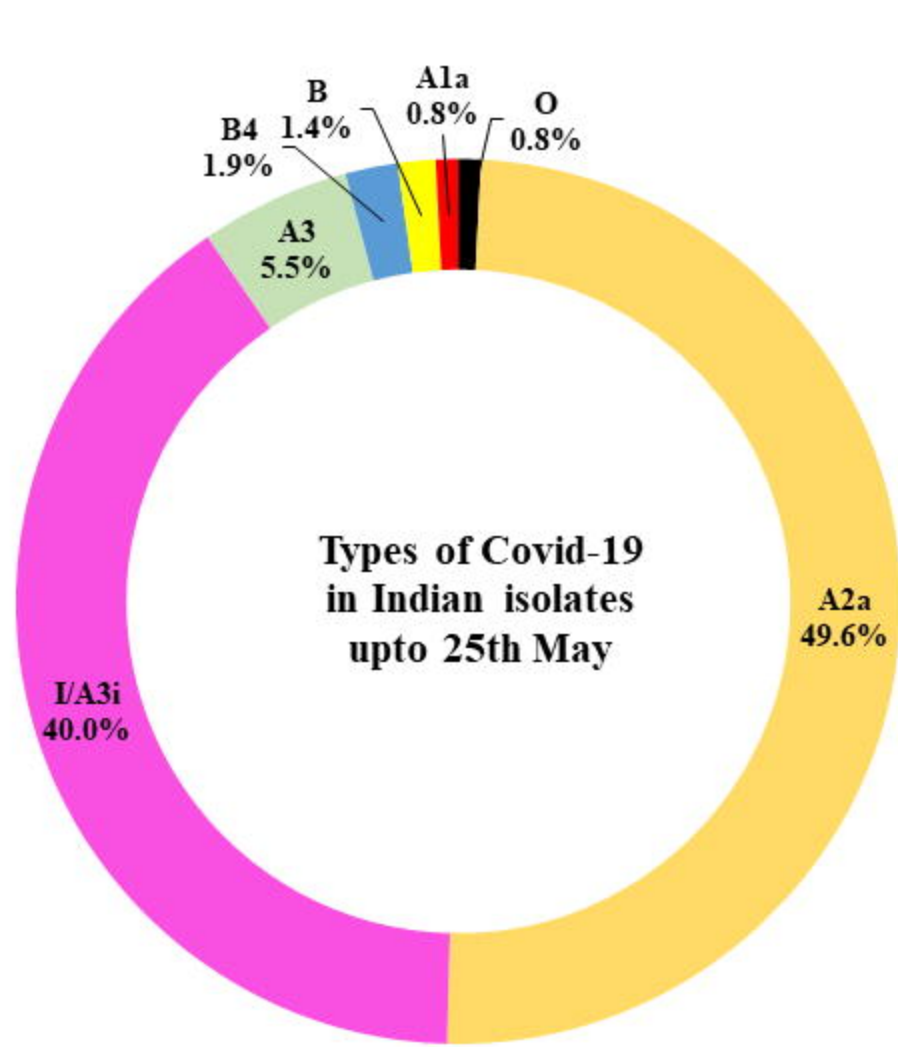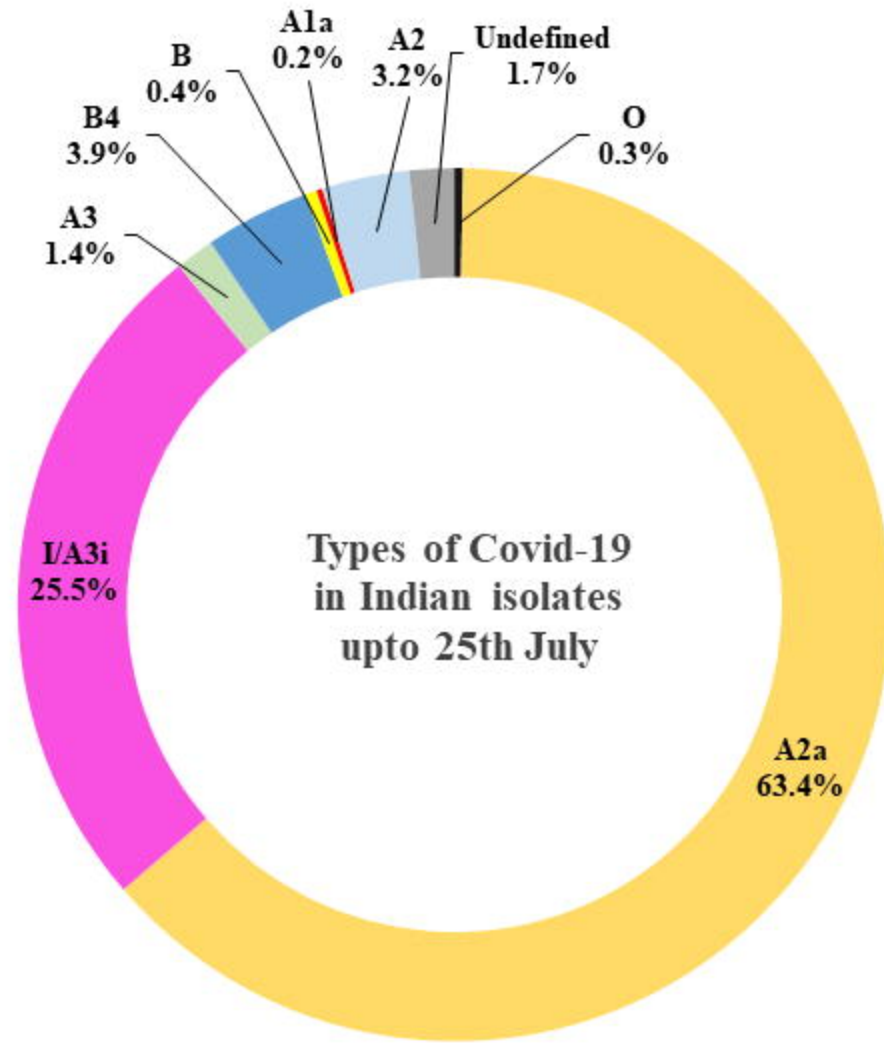

■ O ■ A2a ■ I/A3i ■ A3 ■ B4 ■ B ■ Ala ■ A2 ■ Undefined

**Fig 1: Distribution of different types of SARS-CoV-2 among the Indian population.** (a) Most of the isolates belong to 2 major types of virus, A2a and I/A3i. A new cluster of viruses I/A3i was found to be getting fixed in the population until 25th May 2020. (b) The extended study revealed that the percentage of I/A3i decreased from 40% to 25% by 25th July 2020 and A2a became the predominant type.



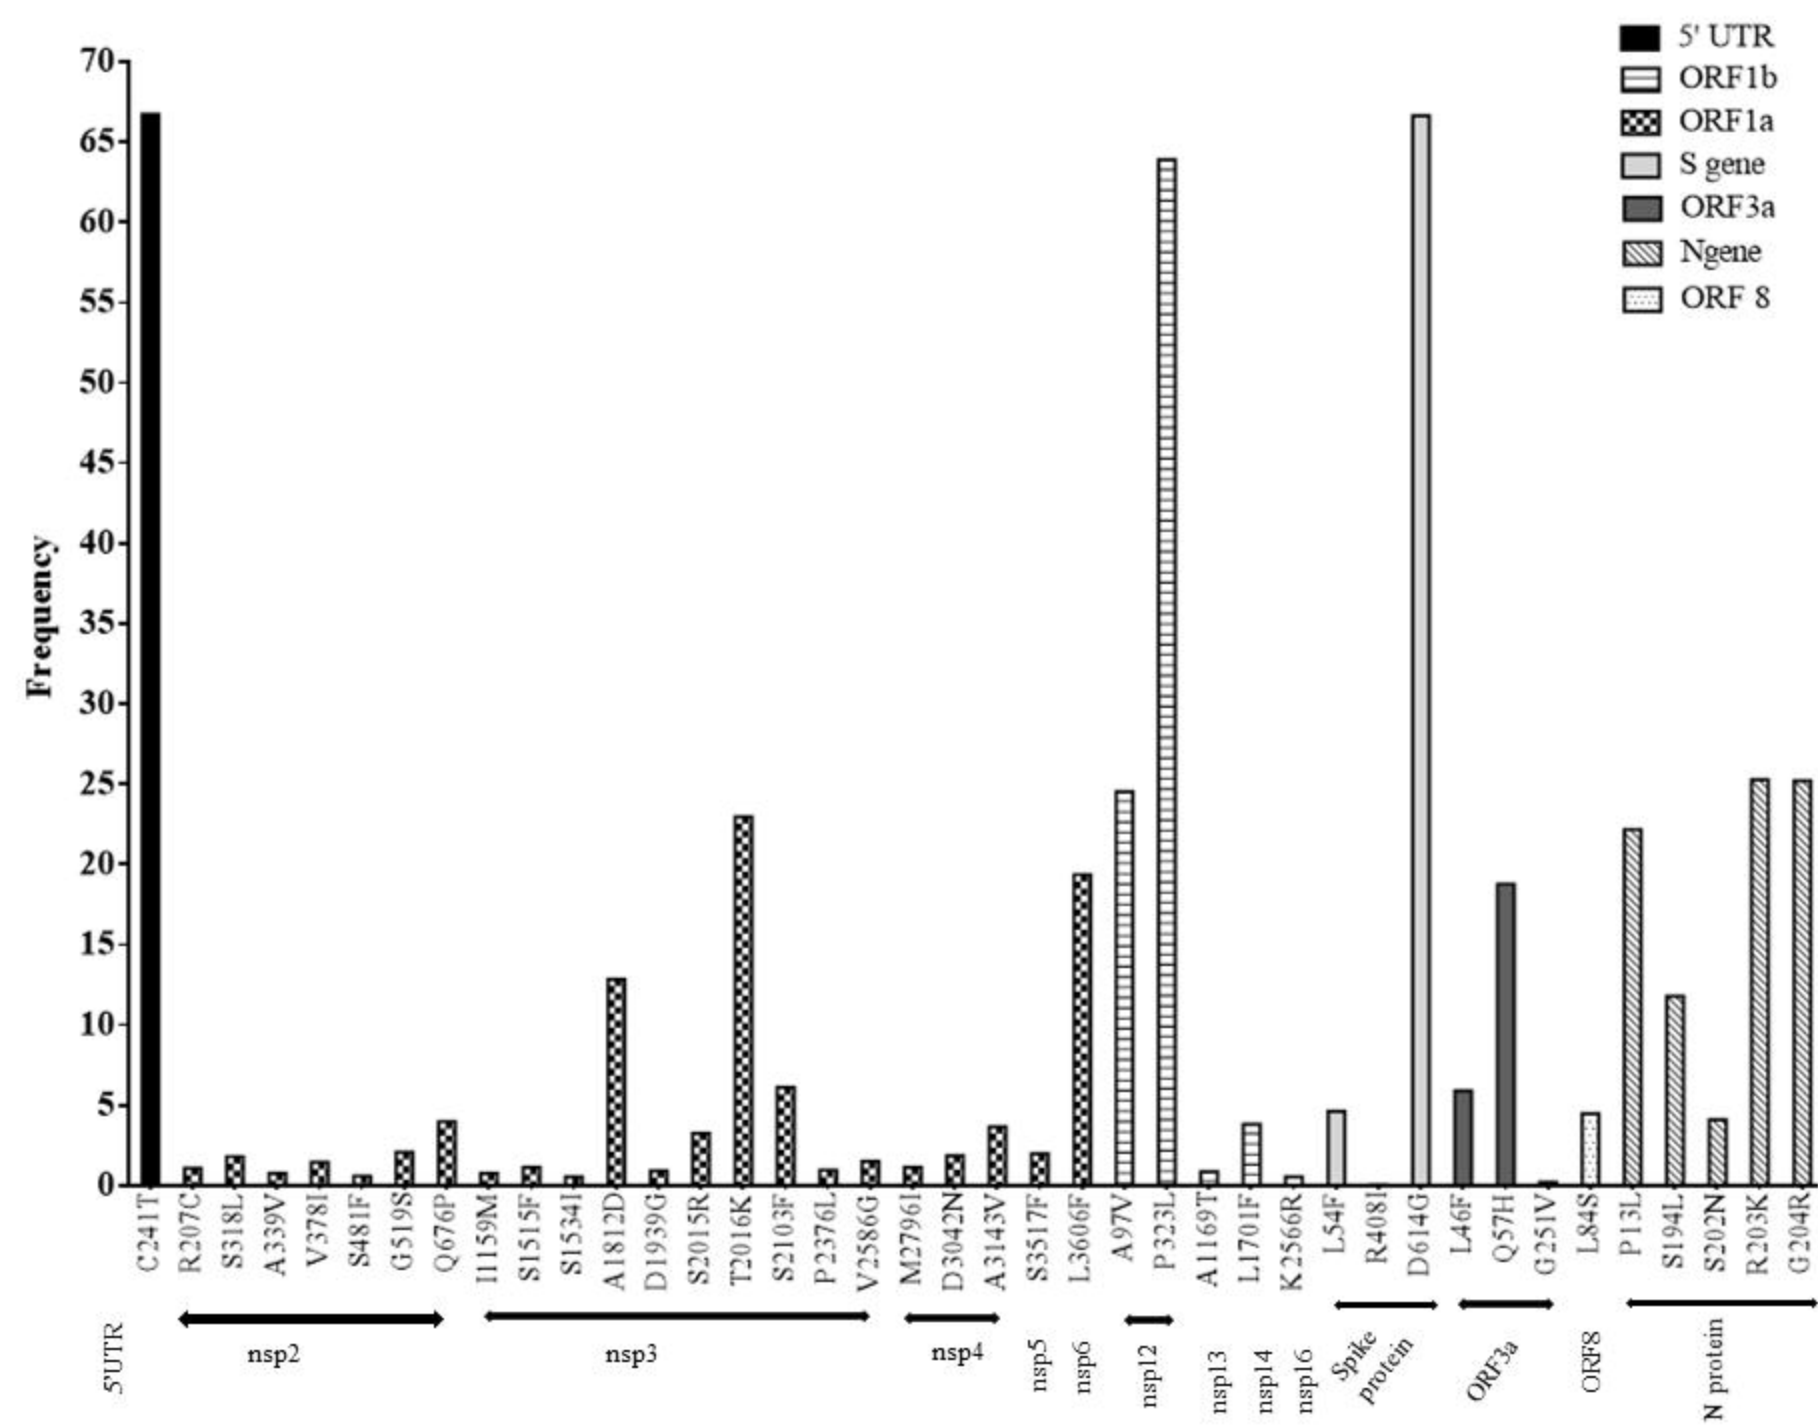

**Fig 2: Distribution of non-synonymous mutations across the Indian SARS-CoV-2 genomes.** Highest accumulation of mutations can be observed in ORF1a compared to the overall genome. Among the non-structural proteins, NSP3 tends to accumulate the greatest number of mutations..

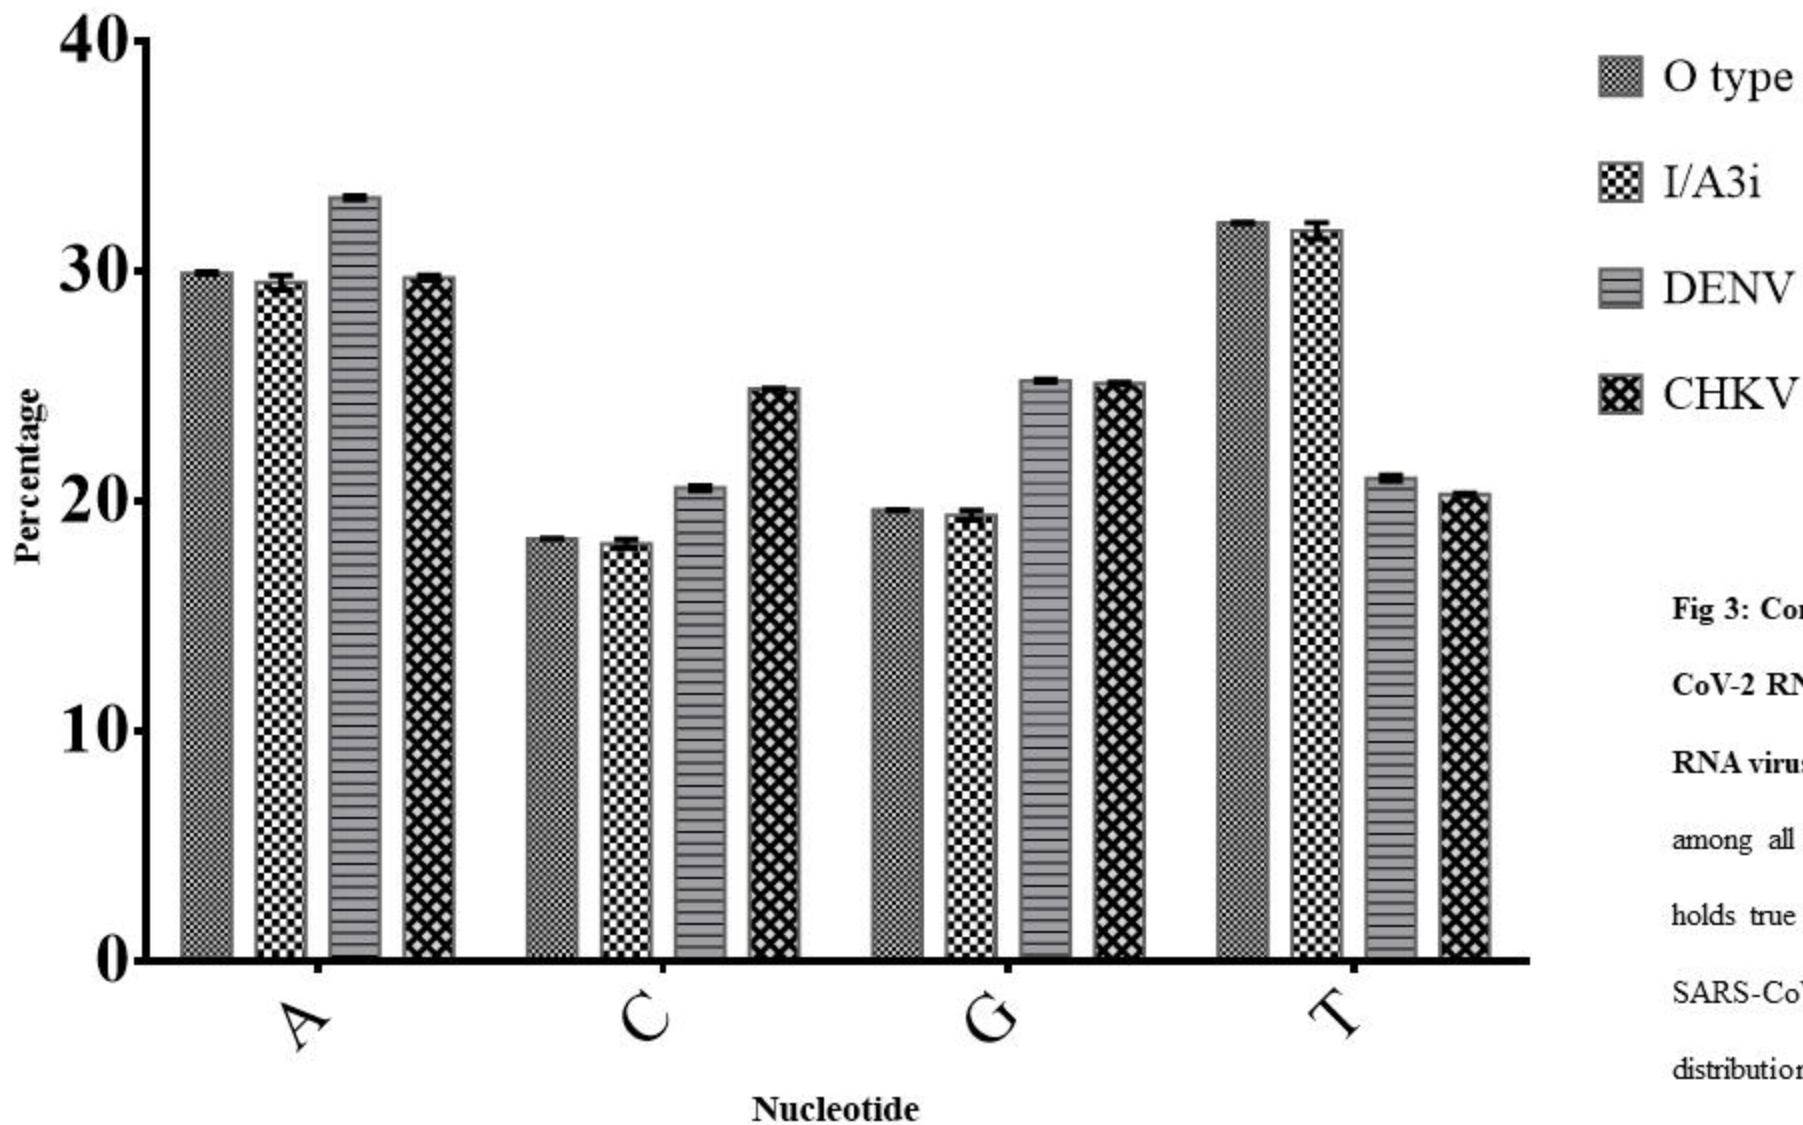

**Fig 3: Comparison of nucleotide composition of SARS-CoV-2 RNA backbone with that of two other prevalent RNA viruses in India.** The frequency of uracil is highest among all four nucleotides in SARS-CoV-2 genomes. This holds true for both older and recently emergent types of SARS-CoV-2 Indian sequences. Average nucleotide distribution in the RNA backbone of each virus was calculated from three sequences for each virus. Error bars represent SD among the three sequences of each virus used in the comparison.

#### Nucleotide changes frequency

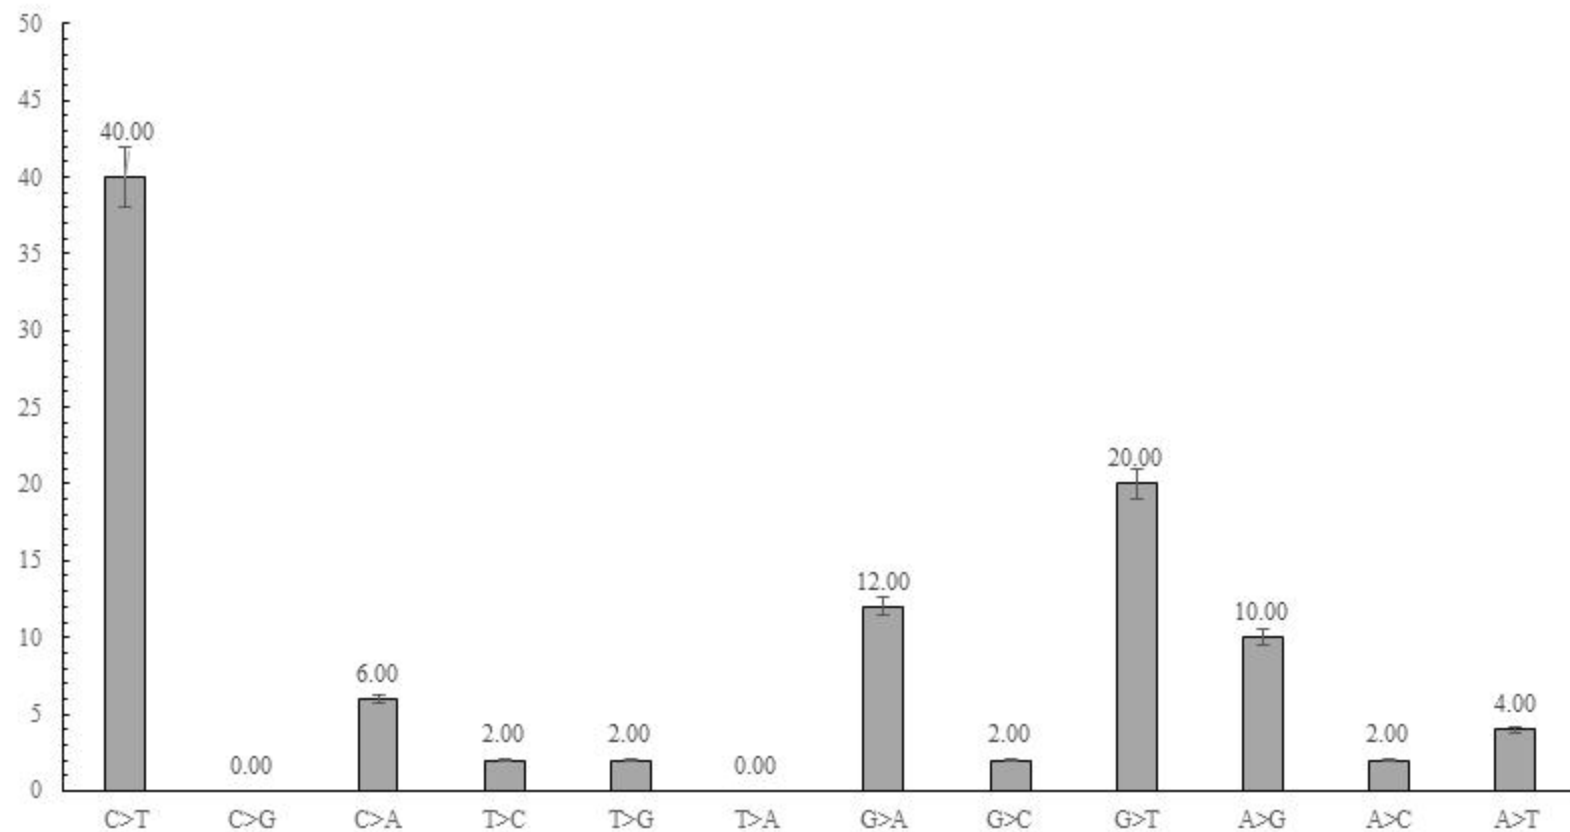

**Fig 4: Frequency of non-synonymous nucleotide substitutions expressed as a percentage of the mutations resulting in amino acid substitutions.** Most frequent changes in nucleotides were observed in form of C>T (40%). Substitution of G to T was recorded second-highest, sharing 20% of the total non-synonymous mutations. Overall, 64% of all the non-synonymous mutations were substitutions to uracil/thymidine.

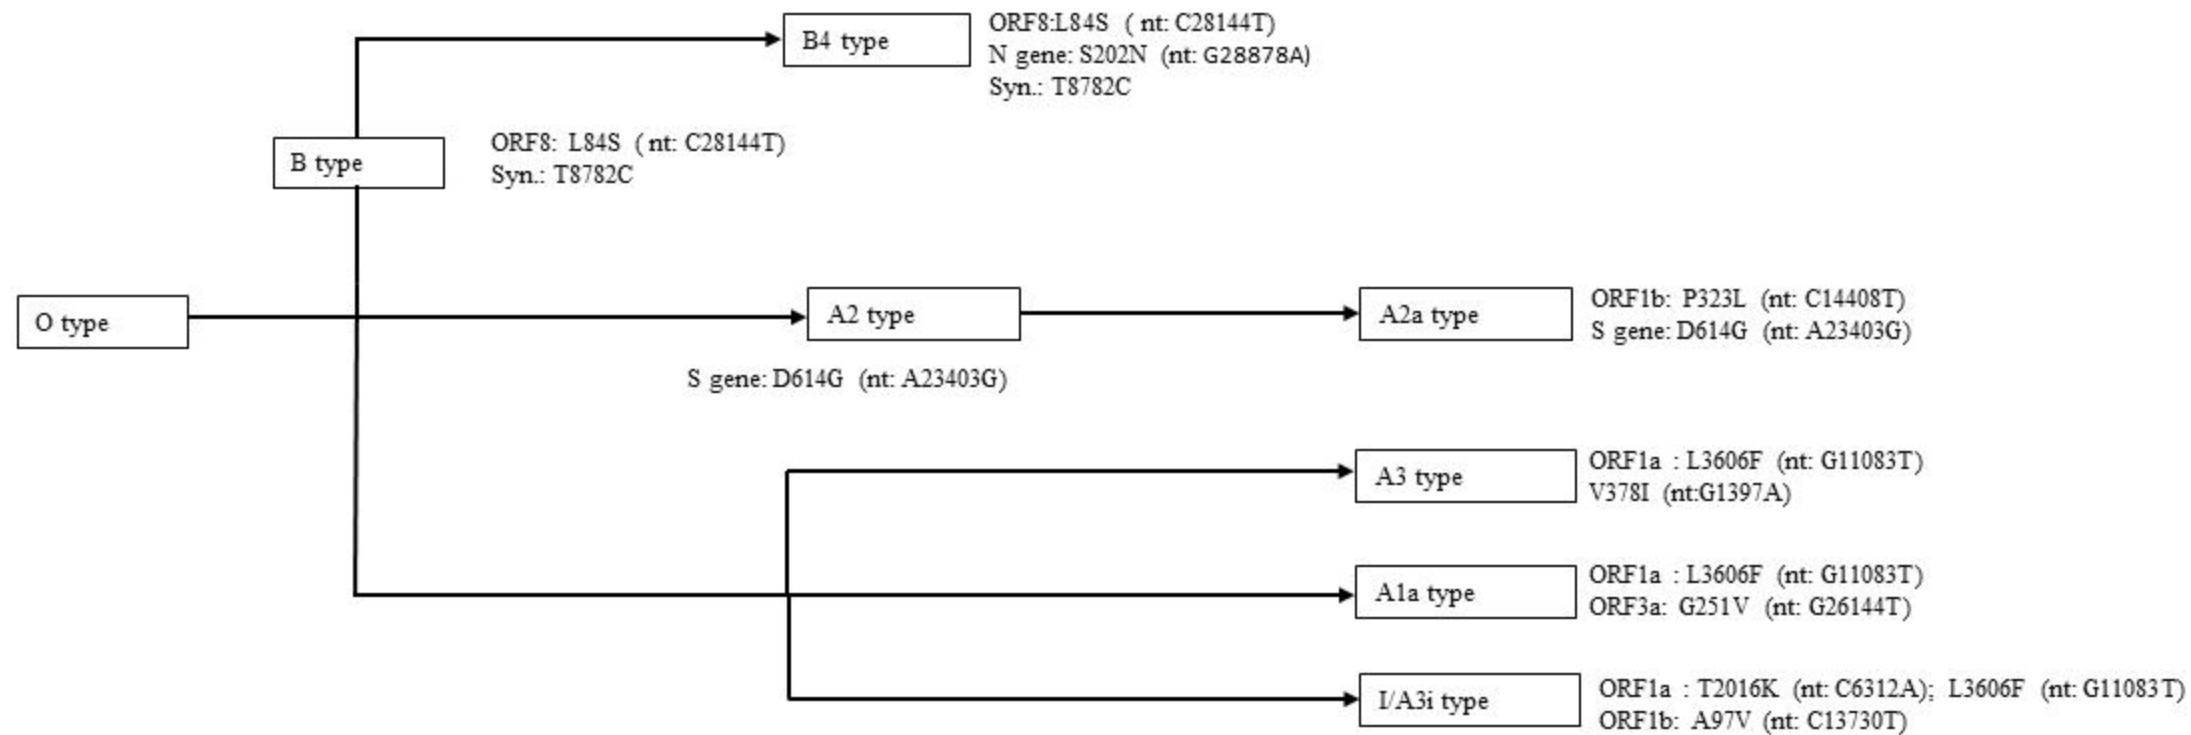

**Fig 5: Schematic representation of SARS-CoV-2 types prevalent in the Indian population up to July 2020.** It is based on the simplified understanding of the non-synonymous changes that shaped the emergence, divergence and prevalence of the different SARS-CoV-2 types.
